# Supplementary material for: The Association of Prenatal Exposure to Perfluorinated Chemicals with Glucocorticoid and Androgenic Hormones in Cord Blood Samples: The Hokkaido Study
Source: PubMed Central journal article supplement (PMC5226690; doi:10.1289/ehp142), 2016-05-24
Supplement: EHP142.s001.acco.pdf [file EHP142.s001.acco.pdf]

**Note to readers with disabilities:** *EHP* strives to ensure that all journal content is accessible to all readers. However, some figures and Supplemental Material published in *EHP* articles may not conform to [508 standards](#) due to the complexity of the information being presented. If you need assistance accessing journal content, please contact [ehp508@niehs.nih.gov](mailto:ehp508@niehs.nih.gov). Our staff will work with you to assess and meet your accessibility needs within 3 working days.

## **Supplemental Material**

### **The Association of Prenatal Exposure to Perfluorinated Chemicals with Glucocorticoid and Androgenic Hormones in Cord Blood Samples: The Hokkaido Study**

Houman Goudarzi, Atsuko Araki, Sachiko Itoh, Seiko Sasaki, Chihiro Miyashita,  
Takahiko Mitsui, Hiroyuki Nakazawa, Katsuya Nonomura, and Reiko Kishi

#### **Table of Contents**

Table S1. Correlations between cord blood glucocorticoid and androgenic hormones (n=185)

Table S2. Association of prenatal PFC levels and cord blood cortisol and cortisone by sex stratification.

Table S3. Association of prenatal PFC levels with cord blood DHEA, and androstenedione by sex stratification.

Table S4. Adjusted least square means (LSM) and regression coefficients ( $\beta$ ) for glucocorticoid and androgenic hormones in cord blood samples by quartiles of PFCs (n=185).

Table S5. Characteristics of mother-infant pairs in current analysis (n=185) compare with non-participants in this analysis (n=244) and participants in original cohort (n=429).

Table S1. Correlations between cord blood glucocorticoid and androgenic hormones

(n=185)

|                 | Cortisol |         | Cortisone |         | DHEA   |         | Androstene-<br>dione |         |
|-----------------|----------|---------|-----------|---------|--------|---------|----------------------|---------|
|                 | $\rho^*$ | p-value | $\rho$    | p-value | $\rho$ | p-value | $\rho$               | p-value |
| Cortisol        | 1        |         |           |         |        |         |                      |         |
| Cortisone       | 0.641    | <0.001  | 1         |         |        |         |                      |         |
| DHEA            | -0.204   | 0.005   | -0.301    | <0.001  | 1      |         |                      |         |
| Androstenedione | 0.113    | 0.123   | 0.154     | 0.035   | 0.329  | <0.001  | 1                    |         |

\*  $\rho$ : Spearman Rho

Table S2. Association of prenatal PFC levels and cord blood cortisol and cortisone by sex stratification.

|                       | PFOS    |                 |         | PFOA    |                 |         |
|-----------------------|---------|-----------------|---------|---------|-----------------|---------|
|                       | $\beta$ | (95% CI)        | p-value | $\beta$ | (95% CI)        | p-value |
| Boys (n=81)           |         |                 |         |         |                 |         |
| Cortisol              |         |                 |         |         |                 |         |
| Crude                 | -0.237  | (-1.27, -0.056) | 0.032   | 0.141   | (-0.176, 0.803) | 0.206   |
| Adjusted <sup>a</sup> | -0.262  | (-1.39, -0.071) | 0.030   | 0.195   | (-0.177, 1.04)  | 0.162   |
| Cortisone             |         |                 |         |         |                 |         |
| Crude                 | -0.308  | (-1.90, -0.349) | 0.005   | 0.084   | (-0.400, 0.890) | 0.452   |
| Adjusted <sup>a</sup> | -0.291  | (-1.92, -0.204) | 0.016   | 0.210   | (-0.164, 1.42)  | 0.118   |
| Girls (n=104)         |         |                 |         |         |                 |         |
| Cortisol              |         |                 |         |         |                 |         |
| Crude                 | -0.279  | (-1.46, -0.284) | 0.004   | 0.088   | (-0.234, 0.624) | 0.369   |
| Adjusted <sup>a</sup> | -0.326  | (-1.76, -0.282) | 0.007   | 0.095   | (-0.280, 0.700) | 0.397   |
| Cortisone             |         |                 |         |         |                 |         |
| Crude                 | -0.283  | (-2.02, -0.409) | 0.003   | 0.055   | (-0.422, 0.757) | 0.574   |
| Adjusted <sup>a</sup> | -0.309  | (-2.36, -0.289) | 0.012   | 0.104   | (-0.368, 0.998) | 0.362   |

<sup>a</sup> Fully adjusted for gestational age, maternal age, parity, smoking and caffeine intake during pregnancy, maternal educational level, and blood sampling period.

Both exposure and outcome measures were log<sub>10</sub> transformed.

Table S3. Association of prenatal PFC levels with cord blood DHEA, and androstenedione by sex stratification.

|                       | PFOS    |                 |         | PFOA    |                  |         |
|-----------------------|---------|-----------------|---------|---------|------------------|---------|
|                       | $\beta$ | (95% CI)        | p-value | $\beta$ | (95% CI)         | p-value |
| Boys (n=81)           |         |                 |         |         |                  |         |
| DHEA                  |         |                 |         |         |                  |         |
| Crude                 | 0.290   | (0.106, 0.701)  | 0.008   | -0.148  | (-0.406, 0.080)  | 0.185   |
| Adjusted <sup>a</sup> | 0.308   | (0.099, 0.755)  | 0.011   | -0.312  | (-0.642, -0.043) | 0.025   |
| Androstenedione       |         |                 |         |         |                  |         |
| Crude                 | -0.092  | (-0.390, 0.161) | 0.410   | -0.193  | (-0.404, 0.026)  | 0.084   |
| Adjusted <sup>a</sup> | -0.011  | (-0.312, 0.284) | 0.926   | -0.230  | (-0.490, 0.038)  | 0.093   |
| Girls (n=104)         |         |                 |         |         |                  |         |
| DHEA                  |         |                 |         |         |                  |         |
| Crude                 | 0.232   | (0.068, 0.694)  | 0.017   | -0.091  | (-0.329, 0.199)  | 0.354   |
| Adjusted <sup>a</sup> | 0.238   | (-0.016, 0.796) | 0.059   | -0.170  | (-0.457, 0.065)  | 0.140   |
| Androstenedione       |         |                 |         |         |                  |         |
| Crude                 | 0.004   | (-0.224, 0.236) | 0.960   | -0.073  | (-0.221, 0.100)  | 0.460   |
| Adjusted <sup>a</sup> | 0.004   | (-0.290, 0.300) | 0.972   | -0.096  | (-0.267, 0.109)  | 0.406   |

<sup>a</sup> Fully adjusted for gestational age, maternal age, parity, smoking and caffeine intake during pregnancy, maternal educational level, and blood sampling period.

Both exposure and outcome measures were log<sub>10</sub> transformed.

Table S4. Adjusted <sup>a</sup> least square means (LSM) and regression coefficients ( $\beta$ ) for glucocorticoid and androgenic hormones in cord blood samples by quartiles of PFCs (n=185).

|                           | Adjusted <sup>a</sup> Cortisol |           |        |        | Adjusted <sup>a</sup> Cortisone |           |         |        | Adjusted <sup>a</sup> DHEA |           |       |       | Adjusted <sup>a</sup> Androstenedione |           |       |      |
|---------------------------|--------------------------------|-----------|--------|--------|---------------------------------|-----------|---------|--------|----------------------------|-----------|-------|-------|---------------------------------------|-----------|-------|------|
|                           | LSM                            | $\beta$   | LCI    | UCI    | LSM                             | $\beta$   | LCI     | UCI    | LSM                        | $\beta$   | LCI   | UCI   | LSM                                   | $\beta$   | LCI   | UCI  |
| PFOs in quartiles (ng/ml) |                                |           |        |        |                                 |           |         |        |                            |           |       |       |                                       |           |       |      |
| Quartile 1 (1.50-3.85)    | 37.12                          | Reference |        |        | 82.48                           | Reference |         |        | 2.46                       | Reference |       |       | 0.51                                  | Reference |       |      |
| Quartile 2 (3.85-5.20)    | 34.66                          | -2.46     | -30.29 | 12.49  | 70.09                           | -12.39    | -94.96  | 32.04  | 2.35                       | -0.11     | -0.55 | 0.73  | 0.50                                  | 0.00      | -0.09 | 0.12 |
| Quartile 3 (5.20-7.25)    | 27.39                          | -9.73     | -34.31 | 6.41   | 62.16                           | -20.32    | -94.17  | 34.87  | 2.40                       | -0.06     | -0.63 | 0.63  | 0.50                                  | -0.01     | -0.09 | 0.12 |
| Quartile 4 (7.25-16.2)    | 13.14                          | -23.98    | -47.12 | -11.99 | 19.27                           | -63.21    | -132.56 | -26.72 | 3.78                       | 1.33      | 0.17  | 1.82  | 0.50                                  | -0.01     | -0.12 | 0.09 |
| <i>p</i> for trend        | 0.006                          |           |        |        | <0.001                          |           |         |        | 0.017                      |           |       |       | 0.988                                 |           |       |      |
| Q1 vs Q4 (p-value)        | 0.007                          |           |        |        | 0.006                           |           |         |        | 0.048                      |           |       |       | 0.998                                 |           |       |      |
| PFOA in quartiles (ng/ml) |                                |           |        |        |                                 |           |         |        |                            |           |       |       |                                       |           |       |      |
| Quartile 1 (<LOD-0.90)    | 17.85                          | Reference |        |        | 33.12                           | Reference |         |        | 3.48                       | Reference |       |       | 0.58                                  | Reference |       |      |
| Quartile 2 (0.90-1.40)    | 24.51                          | 6.66      | -7.86  | 26.99  | 48.69                           | 15.57     | -23.96  | 74.84  | 2.79                       | -0.68     | -1.31 | 0.17  | 0.51                                  | -0.07     | -0.16 | 0.05 |
| Quartile 3 (1.40-2.20)    | 20.24                          | 2.39      | -16.85 | 16.43  | 29.82                           | -3.30     | -46.26  | 41.97  | 3.05                       | -0.43     | -1.26 | 0.40  | 0.45                                  | -0.13     | -0.20 | 0.03 |
| Quartile 4 (2.20-5.30)    | 30.24                          | 12.39     | -7.23  | 34.41  | 67.43                           | 34.32     | -19.97  | 110.04 | 2.25                       | -1.23     | -1.72 | -0.25 | 0.48                                  | -0.10     | -0.19 | 0.03 |
| <i>p</i> for trend        | 0.075                          |           |        |        | 0.079                           |           |         |        | 0.004                      |           |       |       | 0.122                                 |           |       |      |
| Q1 vs Q4 (p-value)        | 0.272                          |           |        |        | 0.284                           |           |         |        | 0.042                      |           |       |       | 0.350                                 |           |       |      |

<sup>a</sup> Fully adjusted for gestational age, maternal age, parity, smoking and caffeine intake during pregnancy, maternal educational level, and blood sampling period.

LOD: limit of detection

Table S5. Characteristics of mother-infant pairs in current analysis (n=185) compare with non-participants in this analysis (n=244) and participants in original cohort (n=429).

|                                                | Total (n=429)             | Non-participants (n=244)  | Participants (n= 185)     |
|------------------------------------------------|---------------------------|---------------------------|---------------------------|
| Characteristics                                | No. (%)/<br>mean $\pm$ SD | No. (%)/<br>mean $\pm$ SD | No. (%)/<br>mean $\pm$ SD |
| PFOS (median, 25-75 percentile)                | 5.2 (3.4-7.0)             | 5.2 (3.2-6.9)             | 5.2 (3.8-7.2)             |
| PFOA (median, 25-75 percentile)                | 1.3 (0.8-1.8)             | 1.2 (0.7-1.6)             | 1.4 (0.9-2.2)             |
| <b>Maternal characteristics</b>                |                           |                           |                           |
| Age (years)                                    | 30.2 $\pm$ 4.7            | 30.5 $\pm$ 4.8            | 29.7 $\pm$ 4.7            |
| Prepregnancy BMI (kg/m <sup>2</sup> )          | 21.1 $\pm$ 3.0            | 21.2 $\pm$ 3.2            | 21.0 $\pm$ 2.9            |
| Parity; primipara                              | 202 (47.1)                | 103 (42.4)                | 99 (53.5)                 |
| Maternal educational level; $\leq$ 12 years)   | 192 (44.7)                | 106 (43.4)                | 86 (46.5)                 |
| Annual income during pregnancy; <5 million yen | 296 (69.4)                | 167 (68.7)                | 129 (70.5)                |
| Smoking during pregnancy; yes                  | 73 (17.0)                 | 40 (16.4)                 | 33 (17.8)                 |
| Alcohol intake during pregnancy; yes           | 129 (30.0)                | 69 (28.2)                 | 60 (32.4)                 |
| <b>Child characteristics</b>                   |                           |                           |                           |
| Male infants                                   | 198 (46.1)                | 117 (47.9)                | 81 (43.8)                 |
| Gestational age (days)                         | 275.4 $\pm$ 10.0          | 272.7 $\pm$ 11.1          | 278.9 $\pm$ 6.7           |
